# Supplementary material for: Preterm Birth, Family Income, and Intergenerational Income Mobility
Source: PubMed Central journal article supplement (PMC11165381; doi:10.1001/jamanetworkopen.2024.15921), 2024-06-10
Supplement: jamanetwopen-e2415921-s001.pdf [file jamanetwopen-e2415921-s001.pdf]

## Supplementary Online Content

Ahmed A, Pullenayegum E, McDonald SD, et al. Preterm birth, family income, and intergenerational income mobility. *JAMA Netw Open*. 2024;7(6):e2415921.  
doi:10.1001/jamanetworkopen.2024.15921

**eTable 1.** Description of Different Datasets at Statistics Canada Used in the Study and the Relevant Study Variables

**eTable 2.** Characteristics of Individuals Included vs Excluded From the Study Population [N (%)]

**eTable 3.** Characteristics of the Unmatched (a) and Matched Cohorts (b) According to Gestational Age Category [N (%)]

**eTable 4.** The Transition Matrix of Probabilities That the Individual's Income Observed in a Specific Quintile at the End of Follow-Up, Conditional on Their Parents' Quintile at Baseline in the Matched Cohorts by PTB (and GA Subcategories)

**eTable 5.** Coefficients and Standard Errors for the Association Between Gestational Age Categories and Annual Income in the Matched Cohort, in Analyses Including Cross Product Terms Between Gestational Age Categories (GA) and Family Income Quintiles

**eTable 6.** Associations Between Preterm Birth and Annual Family Income at or After the Age of 18 Years for Individuals Born in 1990-1996 in Canada, Overall and Stratified by Family Income Quintiles at Baseline

**eTable 7.** Associations Between Preterm Birth and Mean Difference in Percentile Rank Change (Calculated Using Family Income) for Individuals Born in 1990-1996 in Canada

**eTable 8.** Associations Between Preterm Birth and Annual Income at or After the Age of 18 Years When Individuals Who Died Were Assigned Zero Income, Overall and Stratified by Family Income Quintiles at Baseline

**eTable 9.** Associations Between Preterm Birth and Mean Difference in Percentile Rank Change When Individuals Who Died Were Assigned Lowest Percentile

**eTable 10.** Associations Between Preterm Birth and Annual Income at or After the Age of 18 Years, Overall and Stratified by Family Income Quintiles at Baseline, Only Among Singletons

**eTable 11.** Associations Between Preterm Birth and Mean Difference in Percentile Rank Change Only Among Singletons

**eTable 12.** Associations Between Preterm Birth and Annual Income at or After the Age of 18 Years for Individuals Born in 1990-1996 in Canada, Stratified by Sex

**eTable 13.** Associations Between Preterm Birth and Mean Difference in Percentile Rank Change for Individuals Born in 1990-1996 in Canada in the Matched Cohort, Stratified by Sex

**eTable 14.** Associations Between Preterm Birth and Mean Difference in Percentile Rank Change for Individuals Born in 1990-1996 in Canada in the Matched Cohort, Stratified by Family Income Quintile at Baseline

**eTable 15.** Associations Between Preterm Birth and Mean Difference in Percentile Rank Change for Individuals Born in 1990-1996 in Canada in the Matched Cohort, Stratified by Age Group

**eTable 16.** Associations Between Preterm Birth and Mean Difference in Income-z-Score Change for Individuals Born in 1990-1996 in Canada in the Matched Cohort

This supplementary material has been provided by the authors to give readers additional information about their work.

**eTable 1.** Description of Different Datasets at Statistics Canada Used in the Study and the Relevant Study Variables

| Name of the dataset                           | Brief description                                                                                                                                                                                                                                                       | Study variables                                                                                                                                                                                                                                                                                                                                                                                                                                                                                                                                                                                                                                                                                                                                                                   |
|-----------------------------------------------|-------------------------------------------------------------------------------------------------------------------------------------------------------------------------------------------------------------------------------------------------------------------------|-----------------------------------------------------------------------------------------------------------------------------------------------------------------------------------------------------------------------------------------------------------------------------------------------------------------------------------------------------------------------------------------------------------------------------------------------------------------------------------------------------------------------------------------------------------------------------------------------------------------------------------------------------------------------------------------------------------------------------------------------------------------------------------|
| <b>The Vital Statistics-Birth (VSB) file</b>  | A cross-sectional administrative database that collects data on all live births in Canada from all provincial and territorial vital statistics registries.                                                                                                              | Exposure: gestational age.<br>Matching variables: individual's sex (female or male), the birth plurality (single or multiple), province of birth, and birth year, mother's marital status (single, married, other [includes widowed, divorced, separated], or missing), parental age (<20, 20-24, 25-29, 30-34, 35-39, >40 years for the mother and <25, 25–29,30–34, 35–39, >40 years, or missing for the father), parental place of birth based on Statistical Classification of Countries and Areas of Interest for Social Statistics (Canada, North America excluding Canada, Central and South America, Europe, Africa, Asia, and other [Oceania/Antarctica and adjacent islands, missing, or unknown]), and maternal parity (0, 1, 2, 3, or $\geq 4$ previous live births). |
| <b>The Vital Statistics- Death (VSD) file</b> | A cross-sectional, administrative database that collects mortality data from all provincial and territorial vital statistics registries.                                                                                                                                | Mortality during the time of follow-up.                                                                                                                                                                                                                                                                                                                                                                                                                                                                                                                                                                                                                                                                                                                                           |
| <b>The TI Family File (TIFF)</b>              | The T1FF includes data on all Canadian residents who filed their tax return (T1 form) or received the Canada Child Tax Benefit in a given year with their spouses and children. The T1FF contains demographic information and data on income and household composition. | Outcomes: Annual personal and family income; family income at baseline.<br>Matching variables: family income quintiles at baseline, maternal place of residence (rural/urban).                                                                                                                                                                                                                                                                                                                                                                                                                                                                                                                                                                                                    |

**eTable 2.** Characteristics of Individuals Included vs Excluded From the Study Population [N (%)]

| Characteristics                                                                                                                                                 | Included sample (n= 1,625,480)                                                                                                       | Excluded due to no linkage to maternal tax records at baseline (n=878,790)                                                       | SMD  | Excluded due to missing tax records (n= 76,730)                                                                           | SMD  |
|-----------------------------------------------------------------------------------------------------------------------------------------------------------------|--------------------------------------------------------------------------------------------------------------------------------------|----------------------------------------------------------------------------------------------------------------------------------|------|---------------------------------------------------------------------------------------------------------------------------|------|
| Individual's sex<br>Female<br>Male                                                                                                                              | 794,540 (48.9)<br>830,940 (51.1)                                                                                                     | 427,580 (48.7)<br>451,200 (51.3)                                                                                                 | 0.00 | 34,410 (44.8)<br>42,330 (55.2)                                                                                            | 0.08 |
| Maternal parity<br>0<br>1<br>2<br>3<br>≥4                                                                                                                       | 767,500 (47.2)<br>545,400 (33.6)<br>212,300 (13.1)<br>65,400 (4.0)<br>34,870 (2.1)                                                   | 307,780 (35.0)<br>344,910 (39.2)<br>156,550 (17.8)<br>47,700 (5.4)<br>21,860 (2.5)                                               | 0.26 | 34,610 (45.1)<br>24,520 (32.0)<br>10,660 (13.9)<br>3,970 (5.2)<br>2,980 (3.9)                                             | 0.12 |
| Maternal age<br><20 years<br>20-24 years<br>25-29 years<br>30-34 years<br>35-39 years<br>≥40 years                                                              | 85,990 (5.3)<br>323,970 (19.9)<br>588,430 (36.2)<br>462,150 (28.4)<br>145,960 (9.0)<br>18,980 (1.2)                                  | 64,540 (7.3)<br>158,320 (18)<br>292,480 (33.3)<br>255,850 (29.1)<br>93,690 (10.7)<br>13,900 (1.6)                                | 0.12 | 5,690 (7.4)<br>16,730 (21.8)<br>25,250 (32.9)<br>20,790 (27.1)<br>7,210 (9.4)<br>1,070 (1.4)                              | 0.12 |
| Paternal age<br><25 years<br>25–29 years<br>30–34 years<br>35–39 years<br>≥40 years<br>Missing                                                                  | 183,560 (11.3)<br>468,550 (28.8)<br>531,100 (32.7)<br>247,810 (15.2)<br>100,210 (6.2)<br>94,250 (5.8)                                | 90,660 (10.3)<br>215,480 (24.5)<br>274,610 (31.2)<br>145,670 (16.6)<br>67,700 (7.7)<br>84,680 (9.6)                              | 0.18 | 8,580 (11.2)<br>18,540 (24.2)<br>22,470 (29.3)<br>11,480 (15.0)<br>5,280 (6.9)<br>10,400 (13.6)                           | 0.28 |
| Place of birth<br>Alberta<br>Atlantic Provinces<br>British Columbia<br>Manitoba<br>Ontario<br>Quebec<br>Saskatchewan<br>Yukon, Nunavut, and Northwest Territory | 181,840 (11.2)<br>120,880 (7.4)<br>200,990 (12.4)<br>75,210 (4.6)<br>574,380 (35.3)<br>400,080 (24.6)<br>65,540 (4.0)<br>6,580 (0.4) | 87,060 (9.9)<br>61,330 (7.0)<br>97,020 (11.0)<br>33,280 (3.8)<br>384,630 (43.8)<br>181,160 (20.6)<br>29,190 (3.3)<br>5,130 (0.6) | 0.18 | 7,810 (10.2)<br>3,320 (4.3)<br>10,290 (13.4)<br>3,030 (3.9)<br>24,890 (32.4)<br>24,960 (32.5)<br>1,990 (2.6)<br>440 (0.6) | 0.23 |
| Marital status<br>married                                                                                                                                       | 1,104,640 (68.0)                                                                                                                     | 606,520 (69.0)                                                                                                                   | 0.11 | 46,510 (60.6)                                                                                                             | 0.17 |

|                                    |                  |                |      |               |      |
|------------------------------------|------------------|----------------|------|---------------|------|
| missing                            | 91,160 (5.6)     | 29,700 (3.4)   |      | 6,740 (8.8)   |      |
| Other                              | 29,880 (1.8)     | 17,120 (1.9)   |      | 1,800 (2.3)   |      |
| Single                             | 399,810 (24.6)   | 225,460 (25.7) |      | 21,680 (28.3) |      |
| Birth year                         |                  |                | 1.63 |               | 0.14 |
| 1990                               | 97,450 (6.0)     | 271,950 (30.9) |      | 3,550 (4.6)   |      |
| 1991                               | 127,180 (7.8)    | 243,420 (27.7) |      | 4,940 (6.4)   |      |
| 1992                               | 139,210 (8.6)    | 233,120 (26.5) |      | 5,330 (6.9)   |      |
| 1993                               | 315,410 (19.4)   | 36,800 (4.2)   |      | 14,690 (19.1) |      |
| 1994                               | 322,090 (19.8)   | 32,410 (3.7)   |      | 14,830 (19.3) |      |
| 1995                               | 316,810 (19.5)   | 32,090 (3.7)   |      | 15,770 (20.6) |      |
| 1996                               | 307,330 (18.9)   | 29,000 (3.3)   |      | 17,620 (23.0) |      |
| Maternal place of birth            |                  |                | 0.16 |               | 0.49 |
| Africa                             | 11,600 (0.7)     | 6,140 (0.7)    |      | 1,910 (2.5)   |      |
| Asia                               | 91,490 (5.6)     | 39,600 (4.5)   |      | 8,470 (11.0)  |      |
| Canada                             | 1,319,980 (81.2) | 680,580 (77.4) |      | 46,270 (60.3) |      |
| Central and South America          | 26,570 (1.6)     | 11,630 (1.3)   |      | 3,390 (4.4)   |      |
| Europe                             | 73,810 (4.5)     | 53,640 (6.1)   |      | 5,420 (7.1)   |      |
| North America                      | 18,630 (1.1)     | 14,970 (1.7)   |      | 3,140 (4.1)   |      |
| Other                              | 83,410 (5.1)     | 72,230 (8.2)   |      | 8,150 (10.6)  |      |
| Paternal place of birth            |                  |                | 0.21 |               | 0.57 |
| Africa                             | 13,670 (0.8)     | 6,930 (0.8)    |      | 2,080 (2.7)   |      |
| Asia                               | 88,440 (5.4)     | 38,600 (4.4)   |      | 8,280 (10.8)  |      |
| Canada                             | 1,222,740 (75.2) | 602,180 (68.5) |      | 38,030 (49.6) |      |
| Central and South America          | 27,240 (1.7)     | 10,650 (1.2)   |      | 3,080 (4.0)   |      |
| Europe                             | 84,930 (5.2)     | 59,410 (6.8)   |      | 5,540 (7.2)   |      |
| North America                      | 15,220 (0.9)     | 11,710 (1.3)   |      | 2,770 (3.6)   |      |
| Other                              | 173,240 (10.7)   | 149,320 (17)   |      | 16,950 (22.1) |      |
| Birth plurality                    |                  |                | 0.05 |               | 0.17 |
| Singleton                          | 1,594,780 (98.1) | 855,940 (97.4) |      | 72,550 (94.6) |      |
| Multiple                           | 30,700 (1.9)     | 22,850 (2.6)   |      | 4,180 (5.4)   |      |
| Maternal place of residence        |                  |                | -    |               | 0.19 |
| Urban                              | 1,221,160 (75.1) | -              |      | 63,620 (82.9) |      |
| Rural                              | 404,320 (24.9)   | -              |      | 13,120 (17.1) |      |
| Family income quintile at baseline |                  |                | -    |               | 0.38 |
| Q1 (lowest)                        | 312,730 (19.2)   | -              |      | 26,680 (34.8) |      |
| Q2                                 | 324,950 (20.0)   | -              |      | 15,810 (20.6) |      |
| Q3                                 | 328,680 (20.2)   | -              |      | 12,190 (15.9) |      |
| Q4                                 | 330,490 (20.3)   | -              |      | 10,460 (13.6) |      |
| Q5 (highest)                       | 328,650 (20.2)   | -              |      | 11,600 (15.1) |      |
| Preterm birth                      |                  |                | 0.04 |               | 0.11 |
| Preterm 24-36                      | 111,820 (6.9)    | 68,440 (7.8)   |      | 7,640 (10.0)  |      |

|                            |                  |                |      |               |      |
|----------------------------|------------------|----------------|------|---------------|------|
| Term 37-41                 | 2,259,060 (93.1) | 810,340 (92.2) |      | 69,090 (90.0) |      |
| Gestational age categories |                  |                | 0.05 |               | 0.12 |
| 37-41                      | 1,513,670 (93.1) | 810,340 (92.2) |      | 69,090 (90.0) |      |
| 34-36                      | 87,540 (5.4)     | 49,720 (5.7)   |      | 5,450 (7.1)   |      |
| 32-33                      | 12,130 (0.7)     | 8,690 (1.0)    |      | 920 (1.2)     |      |
| 28-31                      | 8,590 (0.5)      | 6,700 (0.8)    |      | 790 (1.0)     |      |
| 24-27                      | 3,560 (0.2)      | 3,330 (0.4)    |      | 500 (0.6)     |      |

Note: All numbers were rounded to the nearest ten for confidentiality reasons

**eTable 3.** Characteristics of the Unmatched (a) and Matched Cohorts (b) According to Gestational Age Category [N (%)]

**(a) Before matching**

|                           | <b>37-41 weeks<br/>(reference,<br/>n=1,513,670)</b> | <b>34-36 weeks w (n=<br/>87,540)</b> |            | <b>32-33 weeks (n=<br/>12,130)</b> |            | <b>28-31 weeks (n=<br/>8,590)</b> |            | <b>24-27 weeks (n= 3,560)</b> |            |
|---------------------------|-----------------------------------------------------|--------------------------------------|------------|------------------------------------|------------|-----------------------------------|------------|-------------------------------|------------|
| <b>Characteristics</b>    | <b>N (%)</b>                                        | <b>N (%)</b>                         | <b>SMD</b> | <b>N (%)</b>                       | <b>SDM</b> | <b>N (%)</b>                      | <b>SDM</b> | <b>N (%)</b>                  | <b>SDM</b> |
| Individual's sex          |                                                     |                                      | 0.06       |                                    | 0.07       |                                   | 0.08       |                               | 0.04       |
| Female                    | 743,140 (49.1)                                      | 40330 (46.1)                         |            | 5510 (45.4)                        |            | 3890 (45.2)                       |            | 1680 (47.2)                   |            |
| Male                      | 770,530 (50.9)                                      | 47210 (53.9)                         |            | 6630 (54.6)                        |            | 4700 (54.8)                       |            | 1880 (52.8)                   |            |
| Birth plurality           |                                                     |                                      | 0.43       |                                    | 0.65       |                                   | 0.70       |                               | 0.65       |
| Singleton                 | 1,497,750 (98.9)                                    | 77800 (88.9)                         |            | 9720 (80.1)                        |            | 6670 (77.7)                       |            | 2850 (80.0)                   |            |
| Multiple                  | 15,920 (1.1)                                        | 9740 (11.1)                          |            | 2420 (19.9)                        |            | 1920 (22.3)                       |            | 710 (20.0)                    |            |
| Maternal parity           |                                                     |                                      | 0.08       |                                    | 0.10       |                                   | 0.11       |                               | 0.09       |
| 0                         | 712,990 (47.1)                                      | 42780 (48.9)                         |            | 5880 (48.4)                        |            | 4140 (48.2)                       |            | 1720 (48.4)                   |            |
| 1                         | 511,330 (33.8)                                      | 26650 (30.4)                         |            | 3660 (30.2)                        |            | 2640 (30.7)                       |            | 1130 (31.8)                   |            |
| 2                         | 197,460 (13)                                        | 11640 (13.3)                         |            | 1670 (13.7)                        |            | 1120 (13.0)                       |            | 430 (11.9)                    |            |
| 3                         | 60,190 (4.0)                                        | 4080 (4.7)                           |            | 570 (4.7)                          |            | 390 (4.6)                         |            | 170 (4.9)                     |            |
| ≥4                        | 31,710 (2.1)                                        | 2400 (2.7)                           |            | 360 (3.0)                          |            | 300 (3.5)                         |            | 110 (3.0)                     |            |
| Maternal age              |                                                     |                                      | 0.09       |                                    | 0.13       |                                   | 0.17       |                               | 0.17       |
| <20 years                 | 79,080 (5.2)                                        | 5240 (6.0)                           |            | 770 (6.3)                          |            | 640 (7.5)                         |            | 260 (7.4)                     |            |
| 20-24 years               | 301,690 (19.9)                                      | 17460 (19.9)                         |            | 2410 (19.9)                        |            | 1680 (19.5)                       |            | 730 (20.5)                    |            |
| 25-29 years               | 551,210 (36.4)                                      | 29560 (33.8)                         |            | 3910 (32.2)                        |            | 2680 (31.2)                       |            | 1090 (30.6)                   |            |
| 30-34 years               | 430,810 (28.5)                                      | 24460 (27.9)                         |            | 3440 (28.4)                        |            | 2440 (28.4)                       |            | 1010 (28.3)                   |            |
| 35-39 years               | 133,830 (8.8)                                       | 9340 (10.7)                          |            | 1380 (11.4)                        |            | 990 (11.5)                        |            | 420 (11.9)                    |            |
| ≥40 years                 | 17,060 (1.1)                                        | 1480 (1.7)                           |            | 230 (1.9)                          |            | 170 (1.9)                         |            | 50 (1.3)                      |            |
| Paternal age              |                                                     |                                      | 0.09       |                                    | 0.14       |                                   | 0.16       |                               | 0.16       |
| <25 years                 | 170,260 (11.2)                                      | 10240 (11.7)                         |            | 1490 (12.2)                        |            | 1110 (12.9)                       |            | 480 (13.4)                    |            |
| 25-29 years               | 438,380 (29.0)                                      | 23900 (27.3)                         |            | 3170 (26.1)                        |            | 2190 (25.5)                       |            | 910 (25.6)                    |            |
| 30-34 years               | 496,670 (32.8)                                      | 27170 (31.0)                         |            | 3670 (30.3)                        |            | 2540 (29.6)                       |            | 1050 (29.5)                   |            |
| 35-39 years               | 230,290 (15.2)                                      | 13720 (15.7)                         |            | 1890 (15.6)                        |            | 1350 (15.8)                       |            | 560 (15.6)                    |            |
| ≥40 years                 | 92,060 (6.1)                                        | 6320 (7.2)                           |            | 920 (7.6)                          |            | 660 (7.7)                         |            | 250 (7.1)                     |            |
| Missing                   | 86,020 (5.7)                                        | 6200 (7.1)                           |            | 1000 (8.2)                         |            | 730 (8.5)                         |            | 310 (8.8)                     |            |
| Maternal place of birth   |                                                     |                                      | 0.19       |                                    | 0.10       |                                   | 0.08       |                               | 0.13       |
| Africa                    | 10,620 (0.7)                                        | 760 (0.9)                            |            | 90 (0.8)                           |            | 80 (0.9)                          |            | 50 (1.3)                      |            |
| Asia                      | 83,150 (5.5)                                        | 6840 (7.8)                           |            | 820 (6.7)                          |            | 500 (5.8)                         |            | 180 (5.2)                     |            |
| Canada                    | 1,234,900 (81.6)                                    | 65790 (75.1)                         |            | 9600 (79.1)                        |            | 6880 (80.1)                       |            | 2820 (79.1)                   |            |
| Central and South America | 24,010 (1.6)                                        | 1930 (2.2)                           |            | 300 (2.5)                          |            | 210 (2.4)                         |            | 120 (3.3)                     |            |
| Europe                    | 68,880 (4.6)                                        | 3920 (4.5)                           |            | 490 (4.1)                          |            | 360 (4.2)                         |            | 160 (4.4)                     |            |
| North America             | 17,550 (1.2)                                        | 850 (1.0)                            |            | 110 (0.9)                          |            | 90 (1.0)                          |            | 50 (1.3)                      |            |
| Other                     | 74,560 (4.9)                                        | 7460 (8.5)                           |            | 720 (5.9)                          |            | 480 (5.6)                         |            | 190 (5.5)                     |            |

|                                    |                  |              |      |             |      |             |      |                        |      |
|------------------------------------|------------------|--------------|------|-------------|------|-------------|------|------------------------|------|
| Paternal place of birth            |                  |              | 0.18 |             | 0.13 |             | 0.13 |                        | 0.17 |
| Africa                             | 12,620 (0.8)     | 820 (0.9)    |      | 100 (0.8)   |      | 90 (1.0)    |      | 40 (1.2)               |      |
| Asia                               | 80,590 (5.3)     | 6400 (7.3)   |      | 790 (6.5)   |      | 470 (5.4)   |      | 190 (5.4)              |      |
| Canada                             | 1,145,150 (75.7) | 60190 (68.8) |      | 8670 (71.5) |      | 6200 (72.2) |      | 2530 (71.2)            |      |
| Central and South America          | 24,750 (1.6)     | 1870 (2.1)   |      | 300 (2.5)   |      | 220 (2.6)   |      | 110 (3.0)              |      |
| Europe                             | 79,420 (5.2)     | 4430 (5.1)   |      | 550 (4.6)   |      | 390 (4.6)   |      | 140 (3.9)              |      |
| North America                      | 14,300 (0.9)     | 710 (0.8)    |      | 120 (1.0)   |      | 60 (0.7)    |      | 30 (1.0)               |      |
| Other                              | 156,840 (10.4)   | 13120 (15.0) |      | 1600 (13.2) |      | 1170 (13.6) |      | 510 (14.4)             |      |
| Maternal marital status at birth   |                  |              | 0.12 |             | 0.21 |             | 0.24 |                        | 0.26 |
| Married                            | 1,034,400 (68.3) | 55870 (63.8) |      | 7260 (59.8) |      | 5050 (58.8) |      | 2070 (58.1)            |      |
| Other                              | 81,900 (5.4)     | 6750 (7.7)   |      | 1190 (9.8)  |      | 910 (10.6)  |      | 410 (11.5)             |      |
| Missing                            | 27,470 (1.8)     | 1850 (2.1)   |      | 260 (2.2)   |      | 200 (2.4)   |      | 90 (2.5)               |      |
| Single                             | 369,900 (24.4)   | 23070 (26.4) |      | 3420 (28.2) |      | 2430 (28.3) |      | 990 (27.8)             |      |
| Place of birth                     |                  |              | 0.12 |             | 0.09 |             | 0.13 |                        | 0.20 |
| Alberta                            | 169,490 (11.2)   | 9150 (10.4)  |      | 1530 (12.6) |      | 1160 (13.5) |      | 520 (14.6)             |      |
| Atlantic Provinces                 | 112,730 (7.4)    | 6150 (7.0)   |      | 970 (8.0)   |      | 740 (8.6)   |      | 299 (8.4) <sup>a</sup> |      |
| British Columbia                   | 188,710 (12.5)   | 9190 (10.5)  |      | 1540 (12.7) |      | 1060 (12.4) |      | 480 (13.6)             |      |
| Manitoba                           | 69,820 (4.6)     | 4050 (4.6)   |      | 630 (5.2)   |      | 500 (5.8)   |      | 220 (6.1)              |      |
| Ontario                            | 530,330 (35.0)   | 35660 (40.7) |      | 4310 (35.5) |      | 2920 (34)   |      | 1170 (32.8)            |      |
| Quebec                             | 375,020 (24.8)   | 19930 (22.8) |      | 2640 (21.7) |      | 1810 (21.0) |      | 690 (19.3)             |      |
| Saskatchewan                       | 61,340 (4.1)     | 3140 (3.6)   |      | 490 (4.1)   |      | 380 (4.5)   |      | 190 (5.2)              |      |
| Territories                        | 6,230 (0.4)      | 290 (0.3)    |      | 30 (0.2)    |      | 20 (0.2)    |      | 299 (8.4) <sup>a</sup> |      |
| Birth year                         |                  |              | 0.12 |             | 0.21 |             | 0.21 |                        | 0.20 |
| 1990                               | 92,550 (6.1)     | 4010 (4.6)   |      | 440 (3.7)   |      | 310 (3.6)   |      | 140 (4.0)              |      |
| 1991                               | 120,180 (7.9)    | 5680 (6.5)   |      | 660 (5.4)   |      | 470 (5.5)   |      | 190 (5.4)              |      |
| 1992                               | 131,420 (8.7)    | 6360 (7.3)   |      | 700 (5.7)   |      | 510 (5.9)   |      | 230 (6.4)              |      |
| 1993                               | 293,840 (19.4)   | 16880 (19.3) |      | 2400 (19.8) |      | 1660 (19.3) |      | 640 (18.0)             |      |
| 1994                               | 299,070 (19.8)   | 17690 (20.2) |      | 2660 (21.9) |      | 1900 (22.1) |      | 770 (21.7)             |      |
| 1995                               | 292,950 (19.4)   | 18550 (21.2) |      | 2670 (22.0) |      | 1850 (21.6) |      | 790 (22.2)             |      |
| 1996                               | 283,660 (18.7)   | 18380 (21.0) |      | 2600 (21.4) |      | 1890 (22.0) |      | 790 (22.3)             |      |
| Maternal place of residence        |                  |              | 0.06 |             | 0.03 |             | 0.03 |                        | 0.04 |
| Urban                              | 1,134,640 (75.0) | 68000 (77.7) |      | 9240 (76.2) |      | 6560 (76.4) |      | 2720 (76.5)            |      |
| Rural                              | 379,020 (25.0)   | 19550 (22.3) |      | 2890 (23.8) |      | 2030 (23.6) |      | 840 (23.5)             |      |
| Family income quintile at baseline |                  |              | 0.12 |             | 0.12 |             | 0.14 |                        | 0.15 |
| Q1 (lowest)                        | 286,850 (19.0)   | 20190 (23.1) |      | 2810 (23.2) |      | 2050 (23.9) |      | 830 (23.2)             |      |
| Q2                                 | 301,380 (19.9)   | 18450 (21.1) |      | 2530 (20.8) |      | 1800 (20.9) |      | 800 (22.5)             |      |
| Q3                                 | 307,230 (20.3)   | 16950 (19.4) |      | 2260 (18.6) |      | 1600 (18.7) |      | 640 (17.9)             |      |
| Q4                                 | 309,770 (20.5)   | 16120 (18.4) |      | 2300 (19.0) |      | 1620 (18.8) |      | 680 (19.2)             |      |
| Q5 (highest)                       | 308,450 (20.4)   | 15840 (18.1) |      | 2230 (18.4) |      | 1520 (17.7) |      | 610 (17.2)             |      |

Note: All numbers were rounded to the nearest ten for confidentiality reasons

<sup>a</sup> Atlantic provinces and Territories were combined due to small cell count

**(b) After matching [weighted]**

| Characteristics           | 34-36 weeks      |                     | 32-33 weeks       |                        | 28-31 weeks       |                        | 24-27 weeks       |                         |
|---------------------------|------------------|---------------------|-------------------|------------------------|-------------------|------------------------|-------------------|-------------------------|
|                           | Term (n=832,120) | Preterm (n= 70,580) | Term (n= 307,520) | Preterm (n= 8,990)     | Term (n= 224,930) | Preterm (n= 6,190)     | Term (n= 101,640) | Preterm (n= 2,560)      |
| Individual's sex          |                  |                     |                   |                        |                   |                        |                   |                         |
| Female                    | 380610 (45.7)    | 32280 (45.7)        | 137310 (44.7)     | 4020 (44.7)            | 99980 (44.4)      | 2750 (44.4)            | 47360 (46.6)      | 1190 (46.6)             |
| Male                      | 451510 (54.3)    | 38300 (54.3)        | 170210 (55.3)     | 4980 (55.3)            | 124950 (55.6)     | 3440 (55.6)            | 54280 (53.4)      | 1370 (53.4)             |
| Birth plurality           |                  |                     |                   |                        |                   |                        |                   |                         |
| Singleton                 | 801010 (96.3)    | 67940 (96.3)        | 285740 (92.9)     | 8360 (92.9)            | 207780 (92.4)     | 5720 (92.4)            | 94810 (93.3)      | 2390 (93.3)             |
| Multiple                  | 31110 (3.7)      | 2640 (3.7)          | 21780 (7.1)       | 640 (7.1)              | 17150 (7.6)       | 470 (7.6)              | 6830 (6.7)        | 170 (6.7)               |
| Maternal parity           |                  |                     |                   |                        |                   |                        |                   |                         |
| 0                         | 438600 (52.7)    | 37200 (52.7)        | 165350 (53.8)     | 4840 (53.8)            | 121420 (54.0)     | 3340 (54.0)            | 54040 (53.2)      | 1360 (53.2)             |
| 1                         | 252350 (30.3)    | 21410 (30.3)        | 90300 (29.4)      | 2640 (29.4)            | 66150 (29.4)      | 1820 (29.4)            | 30830 (30.3)      | 780 (30.3)              |
| 2                         | 98770 (11.9)     | 8380 (11.9)         | 36690 (11.9)      | 1070 (11.9)            | 25620 (11.4)      | 710 (11.4)             | 10890 (10.7)      | 270 (10.7)              |
| 3                         | 27710 (3.3)      | 2350 (3.3)          | 9680 (3.1)        | 280 (3.1)              | 7520 (3.3)        | 210 (3.3)              | 3810 (3.8)        | 100 (3.8)               |
| ≥4                        | 14690 (1.8)      | 1250 (1.8)          | 5500 (1.8)        | 160 (1.8)              | 4220 (1.9)        | 120 (1.9)              | 2070 (2.0)        | 50 (2.0)                |
| Maternal age              |                  |                     |                   |                        |                   |                        |                   |                         |
| <20 years                 | 50130 (6.0)      | 4250 (6.0)          | 19800 (6.4)       | 580 (6.4)              | 17370 (7.7)       | 480 (7.7)              | 7510 (7.4)        | 190 (7.4)               |
| 20-24 years               | 168130 (20.2)    | 14260 (20.2)        | 62130 (20.2)      | 1820 (20.2)            | 44080 (19.6)      | 1210 (19.6)            | 20900 (20.6)      | 530 (20.6)              |
| 25-29 years               | 294510 (35.4)    | 24980 (35.4)        | 103570 (33.7)     | 3030 (33.7)            | 73380 (32.6)      | 2020 (32.6)            | 32260 (31.7)      | 810 (31.7)              |
| 30-34 years               | 235620 (28.3)    | 19990 (28.3)        | 88730 (28.9)      | 2600 (28.9)            | 64980 (28.9)      | 1790 (28.9)            | 29800 (29.3)      | 750 (29.3)              |
| 35-39 years               | 76550 (9.2)      | 6490 (9.2)          | 29990 (9.8)       | 880 (9.8)              | 22280 (9.9)       | 610 (9.9)              | 10450 (10.3)      | 280 (11.0) <sup>a</sup> |
| ≥40 years                 | 7180 (0.9)       | 610 (0.9)           | 3320 (1.1)        | 100 (1.1)              | 2830 (1.3)        | 80 (1.3)               | 720 (0.7)         | 280 (11.0) <sup>a</sup> |
| Paternal age              |                  |                     |                   |                        |                   |                        |                   |                         |
| <25 years                 | 97750 (11.7)     | 8290 (11.7)         | 39120 (12.7)      | 1140 (12.7)            | 29840 (13.3)      | 820 (13.3)             | 12950 (12.7)      | 330 (12.7)              |
| 25-29 years               | 237640 (28.6)    | 20160 (28.6)        | 83630 (27.2)      | 2450 (27.2)            | 59200 (26.3)      | 1630 (26.3)            | 27340 (26.9)      | 690 (26.9)              |
| 30-34 years               | 269350 (32.4)    | 22850 (32.4)        | 97480 (31.7)      | 2850 (31.7)            | 70180 (31.2)      | 1930 (31.2)            | 31590 (31.1)      | 800 (31.1)              |
| 35-39 years               | 123990 (14.9)    | 10520 (14.9)        | 45510 (14.8)      | 1330 (14.8)            | 34160 (15.2)      | 940 (15.2)             | 15100 (14.9)      | 380 (14.9)              |
| ≥40 years                 | 46630 (5.6)      | 3960 (5.6)          | 18090 (5.9)       | 530 (5.9)              | 12790 (5.7)       | 350 (5.7)              | 6080 (6.0)        | 150 (6.0)               |
| Missing                   | 56770 (6.8)      | 4820 (6.8)          | 23690 (7.7)       | 690 (7.7)              | 18750 (8.3)       | 520 (8.3)              | 8580 (8.4)        | 220 (8.4)               |
| Maternal place of birth   |                  |                     |                   |                        |                   |                        |                   |                         |
| Africa                    | 3770 (0.5)       | 320 (0.5)           | 890 (0.3)         | 30 (0.3)               | 1050 (0.5)        | 30 (0.5)               | 640 (0.6)         | 30 (1.0) <sup>c</sup>   |
| Asia                      | 60630 (7.3)      | 5140 (7.3)          | 19350 (6.3)       | 570 (6.3)              | 11010 (4.9)       | 300 (4.9)              | 5130 (5.0)        | 130 (5.0)               |
| Canada                    | 655230 (78.7)    | 55580 (78.7)        | 256270 (83.3)     | 7500 (83.3)            | 190700 (84.8)     | 5250 (84.8)            | 85070 (83.7)      | 2140 (83.7)             |
| Central and South America | 12060 (1.4)      | 1020 (1.4)          | 4990 (1.6)        | 150 (1.6)              | 4110 (1.8)        | 110 (1.8)              | 2540 (2.5)        | 60 (2.5)                |
| Europe                    | 27150 (3.3)      | 2300 (3.3)          | 7970 (2.6)        | 230 (2.6)              | 5340 (2.4)        | 150 (2.4)              | 2380 (2.3)        | 60 (2.3)                |
| Europe                    | 2900 (0.3)       | 250 (0.3)           | 680 (0.2)         | 530 (5.8) <sup>b</sup> | 440 (0.2)         | 350 (5.7) <sup>b</sup> | 440 (0.4)         | 30 (1.0) <sup>c</sup>   |
| North America             | 70370 (8.5)      | 5970 (8.5)          | 17370 (5.6)       | 530 (5.8) <sup>b</sup> | 12280 (5.5)       | 350 (5.7) <sup>b</sup> | 5440 (5.4)        | 140 (5.4)               |

|                                 |               |              |               |                          |               |                         |                         |                        |
|---------------------------------|---------------|--------------|---------------|--------------------------|---------------|-------------------------|-------------------------|------------------------|
| Other                           |               |              |               |                          |               |                         |                         |                        |
| Paternal place of birth         |               |              |               |                          |               |                         |                         |                        |
| Africa                          | 4130 (0.5)    | 350 (0.5)    | 920 (0.3)     | 30 (0.3)                 | 1160 (0.5)    | 30 (0.5)                | 760 (0.7)               | 30 (0.9) <sup>c</sup>  |
| Asia                            | 58090 (7.0)   | 4930 (7.0)   | 18940 (6.2)   | 550 (6.2)                | 10610 (4.7)   | 290 (4.7)               | 4970 (4.9)              | 130 (4.9)              |
| Canada                          | 601950 (72.3) | 51060 (72.3) | 232740 (75.7) | 6810 (75.7)              | 172120 (76.5) | 4740 (76.5)             | 76650 (75.4)            | 1930 (75.4)            |
| Central and South America       | 11620 (1.4)   | 990 (1.4)    | 5090 (1.7)    | 150 (1.7)                | 4180 (1.9)    | 120 (1.9)               | 2380 (2.3)              | 60 (2.3)               |
| Europe                          | 31470 (3.8)   | 2670 (3.8)   | 9640 (3.1)    | 280 (3.1)                | 6610 (2.9)    | 180 (2.9)               | 2940 (2.9)              | 70 (2.9)               |
| North America                   | 2290 (0.3)    | 190 (0.3)    | 620 (0.2)     | 1180 (13.1) <sup>b</sup> | 620 (0.3)     | 840 (13.5) <sup>b</sup> | 240 (0.2)               | 30 (0.9) <sup>c</sup>  |
| Other                           | 122570 (14.7) | 10400 (14.7) | 39560 (12.9)  | 1180 (13.1) <sup>b</sup> | 29620 (13.2)  | 840 (13.5) <sup>b</sup> | 13710 (13.5)            | 350 (13.5)             |
| Marital status                  |               |              |               |                          |               |                         |                         |                        |
| Married                         | 545390 (65.5) | 46260 (65.5) | 191170 (62.2) | 5590 (62.2)              | 137850 (61.3) | 3790 (61.3)             | 60910 (59.9)            | 1530 (59.9)            |
| Other                           | 55400 (6.7)   | 4700 (6.7)   | 25340 (8.2)   | 740 (8.2)                | 20320 (9)     | 560 (9)                 | 9930 (9.8)              | 250 (9.8)              |
| Missing                         | 8710 (1.0)    | 740 (1.0)    | 3320 (1.1)    | 100 (1.1)                | 2540 (1.1)    | 70 (1.1)                | 990 (1.0)               | 30 (1.0)               |
| Single                          | 222620 (26.8) | 18880 (26.8) | 87700 (28.5)  | 2570 (28.5)              | 64220 (28.6)  | 1770 (28.6)             | 29800 (29.3)            | 750 (29.3)             |
| Place of birth                  |               |              |               |                          |               |                         |                         |                        |
| Alberta                         | 81770 (9.8)   | 6940 (9.8)   | 37510 (12.2)  | 1100 (12.2)              | 29770 (13.2)  | 820 (13.2)              | 15100 (14.9)            | 380 (14.9)             |
| Atlantic Provinces              | 57840 (7.0)   | 4910 (7.0)   | 24720 (8.0)   | 730 (8.1) <sup>d</sup>   | 19260 (8.6)   | 540 (8.7) <sup>d</sup>  | 8660 (8.5) <sup>d</sup> | 220 (8.5) <sup>d</sup> |
| British Columbia                | 78510 (9.4)   | 6660 (9.4)   | 34260 (11.1)  | 1000 (11.1)              | 25400 (11.3)  | 700 (11.3)              | 13350 (13.1)            | 340 (13.1)             |
| Manitoba                        | 33780 (4.1)   | 2870 (4.1)   | 13880 (4.5)   | 410 (4.5)                | 11050 (4.9)   | 300 (4.9)               | 6040 (5.9)              | 150 (5.9)              |
| Ontario                         | 353260 (42.5) | 29960 (42.5) | 113890 (37)   | 3330 (37)                | 78970 (35.1)  | 2170 (35.1)             | 33730 (33.2)            | 850 (33.2)             |
| Quebec                          | 198620 (23.9) | 16850 (23.9) | 71320 (23.2)  | 2090 (23.2)              | 50480 (22.4)  | 1390 (22.4)             | 20260 (19.9)            | 510 (19.9)             |
| Saskatchewan Territories        | 26970 (3.2)   | 2290 (3.2)   | 11590 (3.8)   | 340 (3.8)                | 9740 (4.3)    | 270 (4.3)               | 4490 (4.4)              | 110 (4.4)              |
| Other                           | 1380 (0.2)    | 120 (0.2)    | 340 (0.1)     | 730 (8.1) <sup>d</sup>   | 250 (0.1)     | 540 (8.7) <sup>d</sup>  | 8660 (8.5) <sup>d</sup> | 220 (8.5) <sup>d</sup> |
| Birth year                      |               |              |               |                          |               |                         |                         |                        |
| 1990                            | 37950 (4.6)   | 3220 (4.6)   | 10330 (3.4)   | 300 (3.4)                | 8140 (3.6)    | 220 (3.6)               | 4050 (4.0)              | 100 (4.0)              |
| 1991                            | 54080 (6.5)   | 4590 (6.5)   | 17130 (5.6)   | 500 (5.6)                | 12570 (5.6)   | 350 (5.6)               | 5400 (5.3)              | 140 (5.3)              |
| 1992                            | 61490 (7.4)   | 5220 (7.4)   | 17850 (5.8)   | 520 (5.8)                | 13770 (6.1)   | 380 (6.1)               | 5880 (5.8)              | 150 (5.8)              |
| 1993                            | 161070 (19.4) | 13660 (19.4) | 61960 (20.1)  | 1810 (20.1)              | 44270 (19.7)  | 1220 (19.7)             | 18720 (18.4)            | 470 (18.4)             |
| 1994                            | 168220 (20.2) | 14270 (20.2) | 68180 (22.2)  | 1990 (22.2)              | 49830 (22.2)  | 1370 (22.2)             | 22810 (22.4)            | 570 (22.4)             |
| 1995                            | 176380 (21.2) | 14960 (21.2) | 66260 (21.5)  | 1940 (21.5)              | 49750 (22.1)  | 1370 (22.1)             | 22730 (22.4)            | 570 (22.4)             |
| 1996                            | 172930 (20.8) | 14670 (20.8) | 65820 (21.4)  | 1930 (21.4)              | 46590 (20.7)  | 1280 (20.7)             | 22050 (21.7)            | 560 (21.7)             |
| Maternal place of residence     |               |              |               |                          |               |                         |                         |                        |
| Urban                           | 652130 (78.4) | 55320 (78.4) | 236950 (77.1) | 6930 (77.1)              | 174490 (77.6) | 4800 (77.6)             | 236950 (77.1)           | 6930 (77.1)            |
| Rural                           | 179990 (21.6) | 15270 (21.6) | 70570 (22.9)  | 2060 (22.9)              | 50450 (22.4)  | 1390 (22.4)             | 70570 (22.9)            | 2060 (22.9)            |
| Family income quintile at birth |               |              |               |                          |               |                         |                         |                        |
| Q1 (lowest)                     | 181870 (21.9) | 15430 (21.9) | 67490 (21.9)  | 1970 (21.9)              | 51280 (22.8)  | 1410 (22.8)             | 67490 (21.9)            | 1970 (21.9)            |

|              |               |              |              |             |              |             |              |             |
|--------------|---------------|--------------|--------------|-------------|--------------|-------------|--------------|-------------|
| Q2           | 171160 (20.6) | 14520 (20.6) | 62370 (20.3) | 1820 (20.3) | 45180 (20.1) | 1240 (20.1) | 62370 (20.3) | 1820 (20.3) |
| Q3           | 161300 (19.4) | 13680 (19.4) | 57240 (18.6) | 1670 (18.6) | 42270 (18.8) | 1160 (18.8) | 57240 (18.6) | 1670 (18.6) |
| Q4           | 158040 (19.0) | 13410 (19.0) | 60550 (19.7) | 1770 (19.7) | 43470 (19.3) | 1200 (19.3) | 60550 (19.7) | 1770 (19.7) |
| Q5 (highest) | 159750 (19.2) | 13550 (19.2) | 59870 (19.5) | 1750 (19.5) | 42740 (19.0) | 1180 (19.0) | 59870 (19.5) | 1750 (19.5) |

Note: All numbers were rounded to the nearest ten for confidentiality reasons

<sup>a</sup> Maternal age 35-39 and  $\geq 40$  categories were combined due to small cell count

<sup>b</sup> North America and other categories were combined due to small cell count

<sup>c</sup> North America and Africa were combined due to small cell count

<sup>d</sup> Atlantic provinces and territories were combined due to small cell count

**eTable 4.** The Transition Matrix of Probabilities That the Individual's Income Observed in a Specific Quintile at the End of Follow-Up, Conditional on Their Parents' Quintile at Baseline in the Matched Cohorts by PTB (and GA Subcategories)

a) **Term (37-41 weeks)**

|                        | Child income quintile |                   |                   |                   |                   |
|------------------------|-----------------------|-------------------|-------------------|-------------------|-------------------|
| family income quintile | Q1                    | Q2                | Q3                | Q4                | Q5                |
| Q1                     | 0.30 (0.29, 0.30)     | 0.22 (0.22, 0.23) | 0.19 (0.19, 0.19) | 0.16 (0.16, 0.16) | 0.13 (0.13, 0.13) |
| Q2                     | 0.22 (0.21, 0.22)     | 0.20 (0.20, 0.21) | 0.21 (0.20, 0.21) | 0.20 (0.19, 0.20) | 0.18 (0.17, 0.18) |
| Q3                     | 0.19 (0.18, 0.19)     | 0.20 (0.19, 0.20) | 0.20 (0.20, 0.21) | 0.21 (0.2, 0.21)  | 0.21 (0.20, 0.21) |
| Q4                     | 0.18 (0.18, 0.18)     | 0.19 (0.19, 0.19) | 0.19 (0.19, 0.20) | 0.21 (0.21, 0.21) | 0.23 (0.22, 0.23) |
| Q5                     | 0.19 (0.19, 0.19)     | 0.18 (0.18, 0.18) | 0.18 (0.18, 0.19) | 0.20 (0.19, 0.20) | 0.25 (0.25, 0.26) |

b) **Preterm (24-36 weeks)**

|                        | Child income quintile |                   |                   |                   |                   |
|------------------------|-----------------------|-------------------|-------------------|-------------------|-------------------|
| family income quintile | Q1                    | Q2                | Q3                | Q4                | Q5                |
| Q1                     | 0.31 (0.31, 0.32)     | 0.23 (0.23, 0.24) | 0.19 (0.18, 0.20) | 0.15 (0.15, 0.16) | 0.11 (0.11, 0.12) |
| Q2                     | 0.23 (0.22, 0.24)     | 0.22 (0.21, 0.23) | 0.21 (0.20, 0.21) | 0.19 (0.18, 0.19) | 0.16 (0.15, 0.16) |
| Q3                     | 0.20 (0.19, 0.20)     | 0.21 (0.20, 0.21) | 0.21 (0.20, 0.21) | 0.20 (0.19, 0.20) | 0.19 (0.18, 0.20) |
| Q4                     | 0.19 (0.18, 0.19)     | 0.19 (0.19, 0.20) | 0.20 (0.19, 0.20) | 0.21 (0.21, 0.22) | 0.21 (0.20, 0.22) |
| Q5                     | 0.19 (0.19, 0.20)     | 0.19 (0.19, 0.20) | 0.18 (0.17, 0.19) | 0.18 (0.18, 0.19) | 0.25 (0.24, 0.26) |

c) **Late preterm (34-36 weeks)**

|                        | Child income quintile |                   |                   |                   |                   |
|------------------------|-----------------------|-------------------|-------------------|-------------------|-------------------|
| family income quintile | Q1                    | Q2                | Q3                | Q4                | Q5                |
| Q1                     | 0.31 (0.30, 0.32)     | 0.23 (0.22, 0.24) | 0.19 (0.19, 0.2)  | 0.15 (0.15, 0.16) | 0.12 (0.11, 0.12) |
| Q2                     | 0.23 (0.22, 0.23)     | 0.22 (0.21, 0.22) | 0.21 (0.2, 0.22)  | 0.19 (0.18, 0.20) | 0.16 (0.15, 0.17) |
| Q3                     | 0.19 (0.19, 0.20)     | 0.20 (0.19, 0.21) | 0.21 (0.2, 0.22)  | 0.20 (0.19, 0.20) | 0.20 (0.19, 0.20) |
| Q4                     | 0.18 (0.18, 0.19)     | 0.19 (0.18, 0.20) | 0.2 (0.19, 0.20)  | 0.21 (0.21, 0.22) | 0.21 (0.21, 0.22) |
| Q5                     | 0.19 (0.18, 0.19)     | 0.19 (0.18, 0.20) | 0.18 (0.17, 0.19) | 0.19 (0.18, 0.19) | 0.26 (0.25, 0.27) |

d) **Moderate preterm (32-33)**

|                        | Child income quintile |                   |                   |                   |                   |
|------------------------|-----------------------|-------------------|-------------------|-------------------|-------------------|
| family income quintile | Q1                    | Q2                | Q3                | Q4                | Q5                |
| Q1                     | 0.33 (0.30, 0.35)     | 0.23 (0.21, 0.25) | 0.17 (0.16, 0.19) | 0.15 (0.14, 0.17) | 0.12 (0.10, 0.13) |
| Q2                     | 0.23 (0.21, 0.25)     | 0.23 (0.21, 0.25) | 0.20 (0.18, 0.23) | 0.19 (0.17, 0.21) | 0.15 (0.13, 0.17) |
| Q3                     | 0.21 (0.19, 0.23)     | 0.21 (0.19, 0.23) | 0.21 (0.19, 0.23) | 0.20 (0.18, 0.22) | 0.18 (0.16, 0.20) |
| Q4                     | 0.19 (0.17, 0.21)     | 0.18 (0.16, 0.20) | 0.20 (0.18, 0.22) | 0.21 (0.19, 0.23) | 0.22 (0.20, 0.24) |
| Q5                     | 0.21 (0.19, 0.23)     | 0.19 (0.17, 0.21) | 0.17 (0.15, 0.19) | 0.18 (0.16, 0.20) | 0.25 (0.23, 0.27) |

e) **Very preterm (28-31 weeks)**

|                        | Child income quintile |                   |                   |                   |                   |
|------------------------|-----------------------|-------------------|-------------------|-------------------|-------------------|
| family income quintile | Q1                    | Q2                | Q3                | Q4                | Q5                |
| Q1                     | 0.33 (0.30, 0.35)     | 0.24 (0.21, 0.26) | 0.20 (0.18, 0.22) | 0.15 (0.13, 0.17) | 0.09 (0.07, 0.11) |
| Q2                     | 0.25 (0.22, 0.27)     | 0.25 (0.22, 0.28) | 0.20 (0.18, 0.22) | 0.17 (0.14, 0.19) | 0.13 (0.11, 0.16) |
| Q3                     | 0.19 (0.17, 0.22)     | 0.24 (0.21, 0.26) | 0.21 (0.18, 0.23) | 0.21 (0.19, 0.24) | 0.15 (0.13, 0.18) |
| Q4                     | 0.20 (0.17, 0.22)     | 0.22 (0.20, 0.25) | 0.20 (0.18, 0.23) | 0.20 (0.17, 0.22) | 0.18 (0.16, 0.21) |
| Q5                     | 0.21 (0.19, 0.24)     | 0.22 (0.19, 0.24) | 0.2 (0.18, 0.23)  | 0.16 (0.14, 0.19) | 0.20 (0.18, 0.23) |

f) **Extremely preterm (24-27 weeks)**

|                        | Child income quintile |                   |                   |                   |                   |
|------------------------|-----------------------|-------------------|-------------------|-------------------|-------------------|
| family income quintile | Q1                    | Q2                | Q3                | Q4                | Q5                |
| Q1                     | 0.41 (0.36, 0.46)     | 0.26 (0.22, 0.30) | 0.16 (0.13, 0.20) | 0.09 (0.07, 0.12) | 0.07 (0.05, 0.10) |
| Q2                     | 0.29 (0.24, 0.35)     | 0.28 (0.23, 0.33) | 0.18 (0.15, 0.22) | 0.16 (0.12, 0.19) | 0.09 (0.06, 0.12) |
| Q3                     | 0.28 (0.23, 0.33)     | 0.28 (0.23, 0.32) | 0.21 (0.17, 0.26) | 0.13 (0.10, 0.17) | 0.10 (0.07, 0.13) |
| Q4                     | 0.26 (0.22, 0.31)     | 0.27 (0.22, 0.32) | 0.20 (0.16, 0.25) | 0.16 (0.12, 0.20) | 0.10 (0.07, 0.13) |
| Q5                     | 0.22 (0.17, 0.27)     | 0.23 (0.19, 0.28) | 0.18 (0.14, 0.23) | 0.20 (0.15, 0.24) | 0.17 (0.12, 0.21) |

**eTable 5.** Coefficients and Standard Errors for the Association Between Gestational Age Categories and Annual Income in the Matched Cohort, in Analyses Including Cross Product Terms Between Gestational Age Categories (GA) and Family Income Quintiles

a) Mean income differences

| Variable | 34-36       |     | 32-33       |     | 28-31       |     | 24-27       |      |
|----------|-------------|-----|-------------|-----|-------------|-----|-------------|------|
|          | Coefficient | SE  | Coefficient | SE  | Coefficient | SE  | Coefficient | SE   |
| GA       | -617        | 107 | -949        | 306 | -1700       | 324 | -3810       | 514  |
| Q2       | 2433        | 78  | 2554        | 219 | 2877        | 232 | 1952        | 346  |
| Q3       | 3858        | 79  | 3872        | 209 | 4293        | 230 | 4091        | 410  |
| Q4       | 4471        | 79  | 4620        | 201 | 4910        | 266 | 4023        | 401  |
| Q5       | 6112        | 97  | 6262        | 236 | 6163        | 259 | 5355        | 437  |
| GA*Q2    | 36          | 155 | 133         | 467 | -409        | 495 | 41          | 729  |
| GA*Q3    | 97          | 161 | -190        | 463 | -172        | 511 | -1106       | 834  |
| GA*Q4    | 319         | 165 | 283         | 466 | 182         | 564 | -1391       | 808  |
| GA*Q5    | 362         | 186 | 111         | 539 | -880        | 562 | 280         | 1034 |

b) log-income

| Variable | 34-36       |      | 32-33       |      | 28-31       |      | 24-27       |      |
|----------|-------------|------|-------------|------|-------------|------|-------------|------|
|          | Coefficient | SE   | Coefficient | SE   | Coefficient | SE   | Coefficient | SE   |
| GA       | -0.04       | 0.01 | -0.05       | 0.02 | -0.10       | 0.03 | -0.23       | 0.04 |
| Q2       | 0.13        | 0.01 | 0.13        | 0.02 | 0.16        | 0.02 | 0.09        | 0.03 |
| Q3       | 0.19        | 0.01 | 0.20        | 0.01 | 0.22        | 0.02 | 0.19        | 0.03 |
| Q4       | 0.23        | 0.01 | 0.25        | 0.01 | 0.25        | 0.02 | 0.17        | 0.03 |
| Q5       | 0.28        | 0.01 | 0.29        | 0.01 | 0.30        | 0.02 | 0.21        | 0.03 |
| GA*Q2    | 0.01        | 0.01 | -0.01       | 0.03 | -0.03       | 0.04 | 0.00        | 0.06 |
| GA*Q3    | 0.01        | 0.01 | 0.01        | 0.03 | 0.00        | 0.03 | 0.01        | 0.07 |
| GA*Q4    | 0.02        | 0.01 | 0.02        | 0.03 | 0.00        | 0.04 | -0.05       | 0.06 |
| GA*Q5    | 0.04        | 0.01 | 0.03        | 0.03 | -0.02       | 0.04 | 0.12        | 0.07 |

c) percentile rank change

| Variable | 34-36       |      | 32-33       |      | 28-31       |      | 24-27       |      |
|----------|-------------|------|-------------|------|-------------|------|-------------|------|
|          | Coefficient | SE   | Coefficient | SE   | Coefficient | SE   | Coefficient | SE   |
| GA       | -1.38       | 0.28 | -2.32       | 0.78 | -3.29       | 0.91 | -8.97       | 1.47 |
| Q2       | -13.17      | 0.20 | -13.29      | 0.52 | -12.76      | 0.61 | -13.95      | 0.99 |
| Q3       | -30.15      | 0.21 | -30.14      | 0.53 | -29.28      | 0.62 | -30.52      | 0.91 |
| Q4       | -48.85      | 0.19 | -48.60      | 0.50 | -48.00      | 0.63 | -49.90      | 0.98 |
| Q5       | -67.97      | 0.19 | -68.22      | 0.52 | -68.05      | 0.59 | -70.19      | 0.99 |
| GA*Q2    | 0.30        | 0.40 | 0.45        | 1.13 | -1.66       | 1.30 | -0.39       | 2.15 |
| GA*Q3    | 0.63        | 0.41 | -0.37       | 1.16 | -0.36       | 1.32 | -2.76       | 2.13 |
| GA*Q4    | 1.01        | 0.42 | 1.05        | 1.16 | 0.08        | 1.35 | -2.16       | 2.17 |
| GA*Q5    | 1.56        | 0.41 | 0.94        | 1.15 | -0.39       | 1.33 | 4.38        | 2.34 |

**eTable 6.** Associations Between Preterm Birth and Annual Family Income at or After the Age of 18 Years for Individuals Born in 1990-1996 in Canada, Overall and Stratified by Family Income Quintiles at Baseline

a) Mean annual employment income.

| Unmatched cohort- Mean income differences in CAD (95% CI) <sup>a</sup>       |                         |                      |                       |                       |                       |                        |
|------------------------------------------------------------------------------|-------------------------|----------------------|-----------------------|-----------------------|-----------------------|------------------------|
| Category                                                                     | Overall                 | Quintile 1 (lowest)  | Quintile 2            | Quintile 3            | Quintile 4            | Quintile 5 (highest)   |
| Preterm birth<br>Preterm (<37 weeks)                                         | -6224 (-6635, -5812)    | -3655 (-3987, -3324) | -4088 (-4510, -3666)  | -4489 (-5008, -3969)  | -3678 (-4510, -2845)  | -3879 (-5630, -2128)   |
| Gestational age category                                                     | -5785 (-6239, -5330)    | -3248 (-3624, -2873) | -3734 (-4208, -3260)  | -4171 (-4743, -3599)  | -3507 (-4295, -2718)  | -3027 (-5016, -1037)   |
| 34-36 weeks                                                                  | -5942 (-7342, -4543)    | -4913 (-5776, -4050) | -3814 (-5115, -2513)  | -5376 (-6973, -3779)  | -1337 (-5961, 3287)   | -3915 (-8741, 911)     |
| 32-33 weeks                                                                  | -9190 (-10392, -7988)   | -4719 (-5796, -3643) | -6570 (-7901, -5240)  | -5832 (-7676, -3989)  | -7134 (-9236, -5032)  | -9450 (-14512, -4387)  |
| 28-31 weeks                                                                  | -13011 (-14803, -11218) | -7936 (-9610, -6261) | -9040 (-11096, -6984) | -7424 (-10962, -3886) | -9354 (-12743, -5964) | -16426 (-23692, -9159) |
| Matched cohort model 1- Mean income differences in CAD (95% CI) <sup>b</sup> |                         |                      |                       |                       |                       |                        |
| Category                                                                     | Overall                 | Quintile 1 (lowest)  | Quintile 2            | Quintile 3            | Quintile 4            | Quintile 5 (highest)   |
| Preterm birth<br>Preterm (<37 w)                                             | -2336 (-2830, -1841)    | -2500 (-2925, -2075) | -2261 (-2789, -1734)  | -2843 (-3486, -2199)  | -1838 (-2687, -989)   | -2249 (-4281, -216)    |
| Gestational age category                                                     | -1873 (-2422, -1323)    | -2281 (-2760, -1803) | -2035 (-2615, -1456)  | -2544 (-3250, -1837)  | -1336 (-2263, -408)   | -1127 (-3396, 1142)    |
| 34-36 weeks                                                                  | -2250 (-3760, -740)     | -3041 (-4278, -1803) | -1336 (-3105, 434)    | -2885 (-4932, -839)   | -1547 (-4457, 1363)   | -2805 (-8640, 3031)    |
| 32-33 weeks                                                                  | -6069 (-7575, -4563)    | -3076 (-4510, -1641) | -4714 (-6434, -2994)  | -5342 (-7417, -3266)  | -6223 (-8975, -3472)  | -11558 (-17408, -5708) |
| 28-31 weeks                                                                  | -8557 (-10966, -6149)   | -6097 (-8426, -3769) | -7249 (-10016, -4481) | -6359 (-11169, -1548) | -7448 (-12224, -2671) | -13761 (-23132, -4390) |

|                                  | Matched cohort model 2- Mean income differences in CAD (95% CI) <sup>b, c</sup> |                      |                      |                       |                       |                        |
|----------------------------------|---------------------------------------------------------------------------------|----------------------|----------------------|-----------------------|-----------------------|------------------------|
| Category                         | Overall                                                                         | Quintile 1 (lowest)  | Quintile 2           | Quintile 3            | Quintile 4            | Quintile 5 (highest)   |
| Preterm birth<br>Preterm (<37 w) | -2333 (-2827, -1839)                                                            | -2498 (-2922, -2074) | -2257 (-2784, -1730) | -2840 (-3483, -2196)  | -1837 (-2686, -988)   | -2258 (-4290, -225)    |
| Gestational age category         | -1872 (-2421, -1322)                                                            | -2280 (-2758, -1803) | -2034 (-2613, -1455) | -2544 (-3250, -1837)  | -1335 (-2263, -408)   | -1130 (-3399, 1139)    |
| 34-36 weeks                      | -2251 (-3761, -741)                                                             | -3038 (-4275, -1801) | -1329 (-3097, 439)   | -2878 (-4925, -831)   | -1545 (-4455, 1364)   | -2830 (-8655, 2995)    |
| 32-33 weeks                      | -6070 (-7575, -4564)                                                            | -3079 (-4510, -1648) | -4703 (-6422, -2984) | -5322 (-7397, -3246)  | -6237 (-8992, -3482)  | -11564 (-17409, -5719) |
| 28-31 weeks                      | -8529 (-10941, -6117)                                                           | -6048 (-8371, -3724) | -7152 (-9905, -4400) | -6222 (-11000, -1444) | -7457 (-12234, -2681) | -14152 (-23571, -4733) |
| 24-27 weeks                      |                                                                                 |                      |                      |                       |                       |                        |

b) Ratio of income per year (log-income)

|                                  | Unmatched cohort- Ratio of income (95% CI) <sup>a</sup>       |                     |                   |                   |                   |                      |
|----------------------------------|---------------------------------------------------------------|---------------------|-------------------|-------------------|-------------------|----------------------|
| Category                         | Overall                                                       | Quintile 1 (lowest) | Quintile 2        | Quintile 3        | Quintile 4        | Quintile 5 (highest) |
| Preterm birth<br>Preterm (<37 w) | 0.90 (0.89, 0.91)                                             | 0.9 (0.89, 0.91)    | 0.91 (0.9, 0.92)  | 0.92 (0.91, 0.93) | 0.95 (0.93, 0.96) | 0.96 (0.94, 0.98)    |
| Gestational age category         | 0.91 (0.90, 0.92)                                             | 0.91 (0.90, 0.92)   | 0.92 (0.91, 0.93) | 0.93 (0.92, 0.94) | 0.95 (0.94, 0.96) | 0.97 (0.95, 0.99)    |
| 34-36 weeks                      | 0.91 (0.88, 0.93)                                             | 0.86 (0.84, 0.89)   | 0.92 (0.89, 0.95) | 0.91 (0.88, 0.94) | 0.98 (0.92, 1.05) | 0.96 (0.92, 1.01)    |
| 32-33 weeks                      | 0.85 (0.83, 0.87)                                             | 0.87 (0.84, 0.90)   | 0.86 (0.83, 0.89) | 0.90 (0.87, 0.93) | 0.90 (0.87, 0.93) | 0.91 (0.86, 0.96)    |
| 28-31 weeks                      | 0.79 (0.76, 0.82)                                             | 0.78 (0.73, 0.82)   | 0.81 (0.77, 0.85) | 0.87 (0.81, 0.94) | 0.86 (0.82, 0.92) | 0.84 (0.77, 0.91)    |
| 24-27 weeks                      |                                                               |                     |                   |                   |                   |                      |
|                                  | Matched cohort model 1- Ratio of income (95% CI) <sup>b</sup> |                     |                   |                   |                   |                      |
| Category                         | Overall                                                       | Quintile 1 (lowest) | Quintile 2        | Quintile 3        | Quintile 4        | Quintile 5 (highest) |
| Preterm birth<br>Preterm (<37 w) | 0.96 (0.95, 0.97)                                             | 0.93 (0.91, 0.94)   | 0.95 (0.94, 0.96) | 0.95 (0.94, 0.96) | 0.97 (0.96, 0.99) | 0.98 (0.96, 1.00)    |
| Gestational age category         | 0.97 (0.96, 0.98)                                             | 0.93 (0.92, 0.95)   | 0.96 (0.94, 0.97) | 0.95 (0.94, 0.97) | 0.98 (0.97, 0.99) | 0.99 (0.97, 1.01)    |
| 34-36 weeks                      | 0.96 (0.94, 0.99)                                             | 0.91 (0.88, 0.95)   | 0.97 (0.93, 1.01) | 0.95 (0.91, 0.99) | 0.98 (0.94, 1.02) | 0.97 (0.92, 1.03)    |
| 32-33 weeks                      | 0.90 (0.87, 0.92)                                             | 0.91 (0.87, 0.95)   | 0.90 (0.86, 0.93) | 0.90 (0.87, 0.94) | 0.91 (0.87, 0.95) | 0.89 (0.83, 0.94)    |
| 28-31 weeks                      | 0.85 (0.82, 0.90)                                             | 0.82 (0.76, 0.89)   | 0.84 (0.78, 0.9)  | 0.89 (0.81, 0.97) | 0.89 (0.83, 0.96) | 0.86 (0.78, 0.96)    |
| 24-27 weeks                      |                                                               |                     |                   |                   |                   |                      |

|                          | Matched cohort model 2- Ratio of income (95% CI) <sup>b,c</sup> |                     |                   |                   |                   |                      |
|--------------------------|-----------------------------------------------------------------|---------------------|-------------------|-------------------|-------------------|----------------------|
| Category                 | Overall                                                         | Quintile 1 (lowest) | Quintile 2        | Quintile 3        | Quintile 4        | Quintile 5 (highest) |
| Preterm birth            |                                                                 |                     |                   |                   |                   |                      |
| Preterm (<37 w)          | 0.96 (0.95, 0.97)                                               | 0.94 (0.93, 0.96)   | 0.96 (0.94, 0.97) | 0.95 (0.94, 0.96) | 0.98 (0.96, 0.99) | 0.98 (0.96, 1.00)    |
| Gestational age category |                                                                 |                     |                   |                   |                   |                      |
| 34-36 weeks              | 0.97 (0.96, 0.98)                                               | 0.95 (0.93, 0.97)   | 0.96 (0.95, 0.97) | 0.96 (0.95, 0.97) | 0.98 (0.97, 0.99) | 0.99 (0.97, 1.01)    |
| 32-33 weeks              | 0.96 (0.94, 0.99)                                               | 0.93 (0.89, 0.97)   | 0.97 (0.93, 1.02) | 0.96 (0.92, 0.99) | 0.99 (0.94, 1.03) | 0.97 (0.91, 1.03)    |
| 28-31 weeks              | 0.91 (0.88, 0.93)                                               | 0.91 (0.87, 0.95)   | 0.91 (0.87, 0.95) | 0.90 (0.87, 0.94) | 0.91 (0.88, 0.96) | 0.89 (0.83, 0.95)    |
| 24-27 weeks              | 0.87 (0.83, 0.91)                                               | 0.85 (0.78, 0.92)   | 0.85 (0.79, 0.93) | 0.89 (0.81, 0.98) | 0.89 (0.83, 0.96) | 0.87 (0.78, 0.97)    |

<sup>a</sup> n= 1,614,150 individuals; 11,727,110 person-year

<sup>b</sup> n= 968,550 for <37 category (6,966,590 person-years); n= 897,970 for 34-36 category (6,465,520 person-years); n= 315,050 for 32-33 category (2,207,450 person-years); n= 229,770 for 28-31 category (1,611,600 person-years); n= 103,160 for 24-27 category (712,350 person-years).

<sup>c</sup> Model 2 used the matched sample and further adjusted for the calendar year and age modeled using restricted cubic splines.

**eTable 7.** Associations Between Preterm Birth and Mean Difference in Percentile Rank Change (Calculated Using Family Income) for Individuals Born in 1990-1996 in Canada

| Category                 | Mean differences (95% CI)      |                              |
|--------------------------|--------------------------------|------------------------------|
|                          | Unmatched Cohorts <sup>a</sup> | Matched Cohorts <sup>b</sup> |
| Preterm birth            |                                |                              |
| Preterm (<37 weeks)      | 0.43 (0.23, 0.63)              | -1.14 (-1.39, -0.89)         |
| Gestational age category |                                |                              |
| 34-36 weeks              | 0.69 (0.46, 0.91)              | -0.94 (-1.23, -0.66)         |
| 32-33 weeks              | -0.15 (-0.74, 0.44)            | -1.27 (-2.02, -0.52)         |
| 28-31 weeks              | -0.76 (-1.52, 0.00)            | -2.47 (-3.45, -1.50)         |
| 24-27 weeks              | -1.58 (-2.83, -0.33)           | -3.47 (-5.07, -1.87)         |

<sup>a</sup> n= 1,614,150 individuals

<sup>b</sup> n= 968,550 for <37 category; n= 897,970 for 34-36 category; n= 315,050 for 32-33 category; n= 229,770 for 28-31 category; n= 103,160 for 24-27 category.

**eTable 8.** Associations Between Preterm Birth and Annual Income at or After the Age of 18 Years When Individuals Who Died Were Assigned Zero Income, Overall and Stratified by Family Income Quintiles at Baseline

a) Mean annual employment income.

| Crude Model- Mean income differences in CAD (95% CI) <sup>a</sup>        |                      |                      |                      |                       |                        |                        |
|--------------------------------------------------------------------------|----------------------|----------------------|----------------------|-----------------------|------------------------|------------------------|
| Category                                                                 | Overall              | Quintile 1 (lowest)  | Quintile 2           | Quintile 3            | Quintile 4             | Quintile 5 (highest)   |
| Preterm birth                                                            |                      |                      |                      |                       |                        |                        |
| Preterm (<37 w)                                                          | -1982 (-2066, -1898) | -1912 (-2062, -1762) | -2193 (-2360, -2025) | -1784 (-1970, -1598)  | -1466 (-1661, -1271)   | -1306 (-1539, -1073)   |
| Gestational age category                                                 |                      |                      |                      |                       |                        |                        |
| 34-36 weeks                                                              | -1487 (-1581, -1393) | -1547 (-1717, -1378) | -1733 (-1920, -1547) | -1310 (-1517, -1104)  | -920 (-1137, -702)     | -654 (-913, -396)      |
| 32-33 weeks                                                              | -2106 (-2356, -1856) | -1970 (-2407, -1534) | -2289 (-2796, -1782) | -2216 (-2767, -1664)  | -1496 (-2073, -919)    | -1393 (-2107, -680)    |
| 28-31 weeks                                                              | -3760 (-4039, -3482) | -3196 (-3676, -2715) | -3738 (-4316, -3159) | -3120 (-3753, -2487)  | -3236 (-3914, -2558)   | -4307 (-5052, -3562)   |
| 24-27 weeks                                                              | -9474 (-9861, -9087) | -7465 (-8142, -6787) | -9020 (-9770, -8271) | -9529 (-10412, -8646) | -10112 (-11036, -9189) | -10497 (-11644, -9349) |
| Matched cohort model 1- Mean income differences (95% CI) <sup>b</sup>    |                      |                      |                      |                       |                        |                        |
| Category                                                                 | Overall              | Quintile 1 (lowest)  | Quintile 2           | Quintile 3            | Quintile 4             | Quintile 5 (highest)   |
| Preterm birth                                                            |                      |                      |                      |                       |                        |                        |
| Preterm (<37 w)                                                          | -1063 (-1168, -959)  | -1157 (-1353, -961)  | -1088 (-1295, -880)  | -1135 (-1360, -909)   | -936 (-1171, -701)     | -986 (-1271, -700)     |
| Gestational age category                                                 |                      |                      |                      |                       |                        |                        |
| 34-36 weeks                                                              | -595 (-709, -481)    | -770 (-988, -551)    | -668 (-896, -440)    | -646 (-893, -400)     | -436 (-694, -179)      | -425 (-732, -119)      |
| 32-33 weeks                                                              | -1320 (-1649, -991)  | -1354 (-1957, -752)  | -1210 (-1885, -536)  | -1646 (-2356, -937)   | -1153 (-1869, -437)    | -1257 (-2199, -315)    |
| 28-31 weeks                                                              | -3039 (-3399, -2679) | -2681 (-3324, -2038) | -2947 (-3694, -2200) | -2992 (-3799, -2185)  | -2791 (-3683, -1899)   | -3866 (-4791, -2942)   |
| 24-27 weeks                                                              | -8329 (-8861, -7796) | -6961 (-7937, -5986) | -7476 (-8475, -6476) | -8931 (-10189, -7674) | -9331 (-10507, -8154)  | -9452 (-11047, -7857)  |
| Matched cohort model 2- Mean income differences (95% CI) <sup>b, c</sup> |                      |                      |                      |                       |                        |                        |
| Category                                                                 | Overall              | Quintile 1 (lowest)  | Quintile 2           | Quintile 3            | Quintile 4             | Quintile 5 (highest)   |
| Preterm birth                                                            |                      |                      |                      |                       |                        |                        |
| Preterm (<37 w)                                                          | -1062 (-1164, -961)  | -1159 (-1350, -968)  | -1084 (-1284, -883)  | -1132 (-1350, -913)   | -935 (-1162, -707)     | -984 (-1263, -705)     |
| Gestational age category                                                 |                      |                      |                      |                       |                        |                        |
| 34-36 weeks                                                              | -595 (-706, -485)    | -772 (-984, -560)    | -666 (-885, -446)    | -644 (-882, -406)     | -436 (-684, -187)      | -424 (-723, -125)      |
| 32-33 weeks                                                              | -1320 (-1642, -997)  | -1363 (-1955, -770)  | -1200 (-1860, -541)  | -1650 (-2331, -970)   | -1153 (-1847, -459)    | -1254 (-2185, -323)    |
| 28-31 weeks                                                              | -3028 (-3384, -2673) | -2672 (-3302, -2042) | -2933 (-3670, -2197) | -2977 (-3771, -2184)  | -2777 (-3664, -1890)   | -3861 (-4768, -2955)   |
| 24-27 weeks                                                              | -8320 (-8852, -7787) | -6961 (-7925, -5997) | -7460 (-8463, -6458) | -8913 (-10175, -7651) | -9312 (-10489, -8136)  | -9443 (-11043, -7842)  |

b) Ratio of income per year

| Crude Model- Ratio of income (95% CI) <sup>a</sup>         |                   |                     |                   |                   |                   |                      |
|------------------------------------------------------------|-------------------|---------------------|-------------------|-------------------|-------------------|----------------------|
| Category                                                   | Overall           | Quintile 1 (lowest) | Quintile 2        | Quintile 3        | Quintile 4        | Quintile 5 (highest) |
| Preterm birth<br>Preterm (<37 weeks)                       | 0.90 (0.9, 0.91)  | 0.89 (0.88, 0.9)    | 0.89 (0.88, 0.9)  | 0.91 (0.91, 0.92) | 0.93 (0.92, 0.94) | 0.94 (0.93, 0.95)    |
| Gestational age category                                   |                   |                     |                   |                   |                   |                      |
| 34-36 weeks                                                | 0.93 (0.92, 0.93) | 0.91 (0.90, 0.92)   | 0.91 (0.90, 0.92) | 0.94 (0.93, 0.95) | 0.96 (0.95, 0.97) | 0.97 (0.96, 0.98)    |
| 32-33 weeks                                                | 0.90 (0.89, 0.91) | 0.89 (0.86, 0.91)   | 0.88 (0.86, 0.91) | 0.89 (0.87, 0.92) | 0.93 (0.90, 0.96) | 0.94 (0.91, 0.97)    |
| 28-31 weeks                                                | 0.82 (0.80, 0.83) | 0.81 (0.79, 0.84)   | 0.81 (0.78, 0.84) | 0.85 (0.82, 0.88) | 0.85 (0.82, 0.88) | 0.81 (0.78, 0.85)    |
| 24-27 weeks                                                | 0.54 (0.52, 0.56) | 0.57 (0.53, 0.61)   | 0.55 (0.51, 0.59) | 0.55 (0.51, 0.59) | 0.53 (0.49, 0.57) | 0.54 (0.50, 0.60)    |
| Adjusted Model 1- Ratio of income (95% CI) <sup>b</sup>    |                   |                     |                   |                   |                   |                      |
| Category                                                   | Overall           | Quintile 1 (lowest) | Quintile 2        | Quintile 3        | Quintile 4        | Quintile 5 (highest) |
| Preterm birth<br>Preterm (<37 w)                           | 0.95 (0.94, 0.95) | 0.93 (0.92, 0.94)   | 0.94 (0.93, 0.95) | 0.94 (0.93, 0.96) | 0.96 (0.94, 0.97) | 0.96 (0.94, 0.97)    |
| Gestational age category                                   |                   |                     |                   |                   |                   |                      |
| 34-36 weeks                                                | 0.97 (0.96, 0.98) | 0.95 (0.94, 0.97)   | 0.96 (0.95, 0.98) | 0.97 (0.96, 0.98) | 0.98 (0.97, 0.99) | 0.98 (0.97, 0.99)    |
| 32-33 weeks                                                | 0.93 (0.92, 0.95) | 0.92 (0.88, 0.95)   | 0.94 (0.90, 0.97) | 0.92 (0.89, 0.95) | 0.95 (0.91, 0.98) | 0.94 (0.91, 0.99)    |
| 28-31 weeks                                                | 0.85 (0.83, 0.87) | 0.84 (0.80, 0.88)   | 0.85 (0.81, 0.89) | 0.86 (0.82, 0.89) | 0.87 (0.83, 0.91) | 0.83 (0.79, 0.87)    |
| 24-27 weeks                                                | 0.58 (0.55, 0.60) | 0.59 (0.54, 0.64)   | 0.60 (0.56, 0.65) | 0.57 (0.52, 0.63) | 0.55 (0.50, 0.60) | 0.58 (0.52, 0.65)    |
| Adjusted Model 2- Ratio of income (95% CI) <sup>b, c</sup> |                   |                     |                   |                   |                   |                      |
| Category                                                   | Overall           | Quintile 1 (lowest) | Quintile 2        | Quintile 3        | Quintile 4        | Quintile 5 (highest) |
| Preterm birth<br>Preterm (<37 w)                           | 0.95 (0.94, 0.95) | 0.93 (0.92, 0.94)   | 0.94 (0.93, 0.95) | 0.94 (0.93, 0.96) | 0.95 (0.94, 0.97) | 0.96 (0.95, 0.98)    |
| Gestational age category                                   |                   |                     |                   |                   |                   |                      |
| 34-36 weeks                                                | 0.97 (0.96, 0.98) | 0.95 (0.93, 0.97)   | 0.96 (0.95, 0.98) | 0.97 (0.95, 0.98) | 0.98 (0.96, 0.99) | 0.99 (0.97, 1.00)    |
| 32-33 weeks                                                | 0.94 (0.92, 0.95) | 0.93 (0.88, 0.97)   | 0.91 (0.87, 0.96) | 0.93 (0.89, 0.98) | 0.94 (0.90, 0.99) | 0.96 (0.91, 1.01)    |
| 28-31 weeks                                                | 0.84 (0.82, 0.86) | 0.85 (0.80, 0.90)   | 0.83 (0.79, 0.87) | 0.84 (0.80, 0.89) | 0.84 (0.79, 0.88) | 0.82 (0.78, 0.87)    |
| 24-27 weeks                                                | 0.58 (0.55, 0.61) | 0.6 (0.54, 0.66)    | 0.59 (0.53, 0.65) | 0.58 (0.51, 0.65) | 0.55 (0.49, 0.61) | 0.58 (0.51, 0.66)    |

<sup>a</sup> n = 1,614,150 individuals; 11,727,110 person-year

<sup>b</sup> n = 968,550 for <37 category (6,966,590 person-years); n = 897,970 for 34-36 category (6,465,520 person-years); n = 315,050 for 32-33 category (2,207,450 person-years); n = 229,770 for 28-31 category (1,611,600 person-years); n = 103,160 for 24-27 category (712,350 person-years).

<sup>c</sup> Model 2 used the matched sample and further adjusted for the calendar year and age modeled using restricted cubic splines.

**eTable 9.** Associations Between Preterm Birth and Mean Difference in Percentile Rank Change When Individuals Who Died Were Assigned Lowest Percentile

| Category                 | Mean differences (95% CI)     |                              |
|--------------------------|-------------------------------|------------------------------|
|                          | Unmatched cohort <sup>a</sup> | Matched cohorts <sup>b</sup> |
| Preterm birth            |                               |                              |
| Preterm (<37 weeks)      | 0.09 (-0.15, 0.34)            | -2.12 (-2.42, -1.83)         |
| Gestational age category |                               |                              |
| 34-36 weeks              | 1.22 (0.94, 1.50)             | -1.03 (-1.36, -0.70)         |
| 32-33 weeks              | -0.62 (-1.31, 0.07)           | -2.94 (-3.83, -2.06)         |
| 28-31 weeks              | -3.39 (-4.22, -2.56)          | -6.38 (-7.46, -5.29)         |
| 24-27 weeks              | -16.85 (-18.15, -15.56)       | -19.04 (-20.75, -17.34)      |

<sup>a</sup> n= 1,614,150 individuals

<sup>b</sup> n= 968,550 for <37 category; n= 897,970 for 34-36 category; n= 315,050 for 32-33 category; n= 229,770 for 28-31 category; n= 103,160 for 24-27 category.

**eTable 10.** Associations Between Preterm Birth and Annual Income at or After the Age of 18 Years, Overall and Stratified by Family Income Quintiles at Baseline, Only Among Singletons

a) Mean annual employment income.

| Category                 | Unmatched cohorts    | Matched cohort       |
|--------------------------|----------------------|----------------------|
| Preterm birth            |                      |                      |
| Preterm (<37 w)          | -1666 (-1755, -1578) | -667 (-771, -563)    |
| Gestational age category |                      |                      |
| 34-36 weeks              | -1446 (-1544, -1349) | -443 (-557, -329)    |
| 32-33 weeks              | -1761 (-2043, -1479) | -810 (-1141, -480)   |
| 28-31 weeks              | -2962 (-3270, -2654) | -2081 (-2444, -1717) |
| 24-27 weeks              | -5452 (-5936, -4968) | -4253 (-4833, -3673) |

Note: analyses stratified by family income quintile were not included because of data confidentiality and security reasons (small count differences between the original cohort and the cohort restricted to singletons)

b) Ratio of income per year

| Category                 | Crude Model- Ratio of income (95% CI)     |                     |                   |                   |                   |                      |
|--------------------------|-------------------------------------------|---------------------|-------------------|-------------------|-------------------|----------------------|
|                          | Overall                                   | Quintile 1 (lowest) | Quintile 2        | Quintile 3        | Quintile 4        | Quintile 5 (highest) |
| Preterm birth            |                                           |                     |                   |                   |                   |                      |
| Preterm (<37 weeks)      | 0.92 (0.91, 0.92)                         | 0.90 (0.89, 0.91)   | 0.90 (0.89, 0.91) | 0.93 (0.92, 0.94) | 0.95 (0.94, 0.96) | 0.97 (0.96, 0.98)    |
| Gestational age category |                                           |                     |                   |                   |                   |                      |
| 34-36 weeks              | 0.93 (0.92, 0.93)                         | 0.91 (0.90, 0.92)   | 0.91 (0.90, 0.92) | 0.94 (0.93, 0.95) | 0.96 (0.95, 0.97) | 0.98 (0.97, 0.99)    |
| 32-33 weeks              | 0.91 (0.90, 0.93)                         | 0.90 (0.87, 0.93)   | 0.90 (0.87, 0.93) | 0.91 (0.88, 0.95) | 0.96 (0.93, 0.99) | 0.95 (0.90, 0.99)    |
| 28-31 weeks              | 0.85 (0.83, 0.86)                         | 0.85 (0.81, 0.88)   | 0.83 (0.79, 0.87) | 0.88 (0.85, 0.92) | 0.91 (0.68, 0.94) | 0.85 (0.81, 0.90)    |
| 24-27 weeks              | 0.69 (0.66, 0.73)                         | 0.73 (0.66, 0.78)   | 0.71 (0.65, 0.77) | 0.71 (0.64, 0.78) | 0.67 (0.60, 0.74) | 0.78 (0.69, 0.88)    |
| Category                 | Adjusted Model - Ratio of income (95% CI) |                     |                   |                   |                   |                      |
|                          | Overall                                   | Quintile 1 (lowest) | Quintile 2        | Quintile 3        | Quintile 4        | Quintile 5 (highest) |
| Preterm birth            |                                           |                     |                   |                   |                   |                      |
| Preterm (<37 w)          | 0.97 (0.96, 0.97)                         | 0.95 (0.94, 0.96)   | 0.96 (0.95, 0.97) | 0.97 (0.95, 0.98) | 0.97 (0.96, 0.98) | 0.98 (0.97, 0.99)    |
| Gestational age category |                                           |                     |                   |                   |                   |                      |
| 34-36 weeks              | 0.98 (0.97, 0.98)                         | 0.96 (0.95, 0.98)   | 0.97 (0.96, 0.98) | 0.98 (0.96, 0.99) | 0.99 (0.97, 1.00) | 0.99 (0.98, 1.00)    |
| 32-33 weeks              | 0.96 (0.94, 0.98)                         | 0.95 (0.91, 0.98)   | 0.96 (0.93, 1.00) | 0.95 (0.91, 0.99) | 0.97 (0.93, 1.00) | 0.96 (0.92, 1.00)    |
| 28-31 weeks              | 0.89 (0.87, 0.91)                         | 0.90 (0.85, 0.94)   | 0.88 (0.84, 0.92) | 0.90 (0.86, 0.94) | 0.92 (0.87, 0.96) | 0.86 (0.82, 0.91)    |
| 24-27 weeks              | 0.76 (0.72, 0.80)                         | 0.75 (0.97, 0.82)   | 0.77 (0.71, 0.84) | 0.74 (0.66, 0.82) | 0.72 (0.64, 0.80) | 0.83 (0.72, 0.94)    |

**eTable 11.** Associations Between Preterm Birth and Mean Difference in Percentile Rank Change Only Among Singletons

| Category                             | Mean differences (95% CI)     |                              |
|--------------------------------------|-------------------------------|------------------------------|
|                                      | Unmatched cohort <sup>a</sup> | Matched cohorts <sup>b</sup> |
| Preterm birth<br>Preterm (<37 weeks) | 1.27 (1.02, 1.52)             | -1.23 (-1.53, -0.94)         |
| Gestational age category             |                               |                              |
| 34-36 weeks                          | 1.60 (1.32, 1.89)             | -0.75 (-1.07, -0.42)         |
| 32-33 weeks                          | 0.84 (0.054, 1.64)            | -1.87 (-2.78, -0.96)         |
| 28-31 weeks                          | -0.47 (-1.43, 0.49)           | -3.76 (-4.88, -2.64)         |
| 24-27 weeks                          | -3.97 (-5.55, -2.40)          | -8.40 (-10.29, -6.50)        |

**eTable 12.** Associations Between Preterm Birth and Annual Income at or After the Age of 18 Years for Individuals Born in 1990-1996 in Canada, Stratified by Sex

|                 | Mean annual employment income |                      |                      |                      |
|-----------------|-------------------------------|----------------------|----------------------|----------------------|
|                 | Females                       |                      | Males                |                      |
| Category        | Unmatched cohorts             | Matched cohorts      | Unmatched cohorts    | Matched cohorts      |
| Preterm (<37 w) | -1500 (-1632, -1449)          | -680 (-789, -562)    | -1900 (-2011, -1749) | -730 (-888, -564)    |
| GA category     |                               |                      |                      |                      |
| 34-36 weeks     | -1300 (-1379, -1175)          | -440 (-559, -310)    | -1700 (-1826, -1533) | -480 (-662, -305)    |
| 32-33 weeks     | -2000 (-2232, -1676)          | -1140 (-1512, -774)  | -1700 (-2120, -1341) | -690 (-1184, -191)   |
| 28-31 weeks     | -2700 (-3050, -2437)          | -1800 (-2227, -1425) | -3000 (-3386, -2519) | -2100 (-2702, -1580) |
| 24-27 weeks     | -4700 (-5153, -4156)          | -3700 (-4403, -3080) | -6200 (-6852, -5471) | -5000 (-5901, -4083) |
|                 | Ratio of income per year      |                      |                      |                      |
|                 | Females                       |                      | Males                |                      |
| Category        | Unmatched cohorts             | Matched cohorts      | Unmatched cohorts    | Matched cohorts      |
| Preterm (<37 w) | 0.92 (0.91, 0.92)             | 0.96 (0.95, 0.97)    | 0.92 (0.91, 0.92)    | 0.97 (0.96, 0.97)    |
| GA category     |                               |                      |                      |                      |
| 34-36 weeks     | 0.93 (0.92, 0.94)             | 0.98 (0.97, 0.98)    | 0.93 (0.92, 0.93)    | 0.98 (0.97, 0.99)    |
| 32-33 weeks     | 0.90 (0.88, 0.91)             | 0.94 (0.91, 0.95)    | 0.92 (0.91, 0.94)    | 0.97 (0.94, 0.99)    |
| 28-31 weeks     | 0.85 (0.84, 0.87)             | 0.90 (0.87, 0.91)    | 0.87 (0.85, 0.89)    | 0.90 (0.88, 0.93)    |
| 24-27 weeks     | 0.75 (0.72, 0.77)             | 0.79 (0.75, 0.83)    | 0.73 (0.70, 0.76)    | 0.77 (0.73, 0.81)    |

**eTable 13.** Associations Between Preterm Birth and Mean Difference in Percentile Rank Change for Individuals Born in 1990-1996 in Canada in the Matched Cohort, Stratified by Sex

| Category        | Females                              |                                                    | Males                                |                                                    |
|-----------------|--------------------------------------|----------------------------------------------------|--------------------------------------|----------------------------------------------------|
|                 | Mean percentile rank change (95% CI) | Mean difference in percentile rank change (95% CI) | Mean percentile rank change (95% CI) | Mean difference in percentile rank change (95% CI) |
| Preterm birth   |                                      |                                                    |                                      |                                                    |
| Preterm (<37 w) | -3.89 (-4.26, -3.52)                 | -1.24 (-1.66, -0.82)                               | 1.50 (1.15, 1.86)                    | -1.23 (-1.64, -0.82)                               |
| Term (37-41 w)  | -2.65 (-2.76, -2.53)                 | Ref.                                               | 2.73 (2.62, 2.85)                    | Ref.                                               |
| GA category     |                                      |                                                    |                                      |                                                    |
| 34-36 weeks     | -3.36 (-3.78, -2.95)                 | -0.62 (-1.08, -0.15)                               | 1.87 (1.47, 2.28)                    | -0.79 (-1.24, -0.34)                               |
| 32-33 weeks     | -4.91 (-6.06, -3.75)                 | -2.41 (-3.69, -1.12)                               | 0.94 (-0.18, 2.05)                   | -1.63 (-2.85, -0.41)                               |
| 28-31 weeks     | -6.61 (-8.05, -5.16)                 | -4.18 (-5.8, -2.56)                                | -0.42 (-1.73, 0.88)                  | -3.55 (-5.00, -2.09)                               |
| 24-27 weeks     | -10.09 (-12.33, -7.85)               | -9.14 (-11.61, -6.68)                              | -3.68 (-6.07, -1.29)                 | -7.97 (-10.58, -5.36)                              |

**eTable 14.** Associations Between Preterm Birth and Mean Difference in Percentile Rank Change for Individuals Born in 1990-1996 in Canada in the Matched Cohort, Stratified by Family Income Quintile at Baseline

| Category        | Mean difference in percentile rank change (95% CI) |                      |                        |                        |                      |
|-----------------|----------------------------------------------------|----------------------|------------------------|------------------------|----------------------|
|                 | Q1                                                 | Q2                   | Q3                     | Q4                     | Q5                   |
| Preterm birth   |                                                    |                      |                        |                        |                      |
| Preterm (<37 w) | -1.83 (-2.33, -1.34)                               | -1.56 (-2.08, -1.04) | -1.44 (-1.95, -0.93)   | -0.88 (-1.41, -0.36)   | -0.33 (-0.86, 0.21)  |
| Term (37-41 w)  | Ref.                                               | Ref.                 | Ref.                   | Ref.                   | Ref.                 |
| GA category     |                                                    |                      |                        |                        |                      |
| 34-36 weeks     | -1.37 (-1.94, -0.8)                                | -1.01 (-1.58, -0.44) | -0.85 (-1.42, -0.29)   | -0.32 (-0.90, 0.26)    | 0.16 (-0.43, 0.76)   |
| 32-33 weeks     | -2.38 (-3.90, -0.86)                               | -1.86 (-3.35, -0.37) | -2.54 (-4.09, -0.98)   | -1.3 (-2.88, 0.27)     | -1.49 (-3.11, 0.14)  |
| 28-31 weeks     | -3.58 (-5.38, -1.78)                               | -4.94 (-6.77, -3.10) | -3.7 (-5.57, -1.82)    | -3.45 (-5.41, -1.49)   | -3.54 (-5.47, -1.60) |
| 24-27 weeks     | -9.58 (-12.36, -6.8)                               | -9.19 (-12.18, -6.2) | -11.57 (-14.77, -8.37) | -11.43 (-14.72, -8.14) | -4.1 (-7.76, -0.44)  |

**eTable 15.** Associations Between Preterm Birth and Mean Difference in Percentile Rank Change for Individuals Born in 1990-1996 in Canada in the Matched Cohort, Stratified by Age Group

|                          | Age 22-25                                          | Age 26-28                                          |
|--------------------------|----------------------------------------------------|----------------------------------------------------|
| Category                 | Mean difference in percentile rank change (95% CI) | Mean difference in percentile rank change (95% CI) |
| Preterm (<37 w)          | -1.19 (-1.52, -0.86)                               | -1.43 (-2.09, -0.78)                               |
| Gestational age category |                                                    |                                                    |
| 34-36 weeks              | -0.65 (-1.01, -0.29)                               | -0.99 (-1.72, -0.27)                               |
| 32-33 weeks              | -1.88 (-2.86, -0.90)                               | -2.51 (-4.76, -0.27)                               |
| 28-31 weeks              | -3.63 (-4.83, -2.43)                               | -4.30 (-7.14, -1.46)                               |
| 24-27 weeks              | -8.90 (-10.87, -6.94)                              | -6.62 (-11.86, -1.38)                              |

**eTable 16.** Associations Between Preterm Birth and Mean Difference in Income-z-Score Change for Individuals Born in 1990-1996 in Canada in the Matched Cohort

|                          | Mean differences (95% CI) |
|--------------------------|---------------------------|
| Preterm (<37 weeks)      | -0.03 (-0.03, -0.02)      |
| Gestational age category |                           |
| 34-36 weeks              | -0.02 (-0.03, -0.01)      |
| 32-33 weeks              | -0.03 (-0.05, 0.00)       |
| 28-31 weeks              | -0.09 (-0.12, -0.05)      |
| 24-27 weeks              | -0.20 (-0.24, -0.14)      |
