# Supplementary material for: Preterm Birth, Family Income, and Intergenerational Income Mobility
Source: PubMed Central journal article supplement (PMC11165381; doi:10.1001/jamanetworkopen.2024.15921), 2024-06-10
Supplement: jamanetwopen-e2415921-s002.pdf [file jamanetwopen-e2415921-s002.pdf]

## Data Sharing Statement

Ahmed. Preterm Birth, Family Income, and Intergenerational Income Mobility. *JAMA Netw Open*. Published June 10, 2024. doi:10.1001/jamanetworkopen.2024.15921

### Data

**Data available:** No

### Additional Information

**Explanation for why data not available:** Due to data privacy considerations, access to the data is available only through Statistics Canada
